# Supplementary material for: Allometric modeling for accurate biomass and carbon estimation in shea trees of west african parklands
Source: Research Square preprint supplement (doi:10.21203/rs.3.rs-6882057/v1), 2025-07-03
Supplement: Supplementary file 1 [file 0600f080044ea86d349589f9.docx]

Table1. Comparison of various GAMMLSS models with different distribution to predict tree aboveground biomass

| Model | Global deviance | df for mu | df for sigma | df for nu | df | AIC | BIC | RMSE | Cox and Snell adjusted R2 |
| --- | --- | --- | --- | --- | --- | --- | --- | --- | --- |
| GIG | 387.1666 | 5 | 1 | 1 | 7 | 401.1666 | 410.975 | 408.428 | 0.9479 |
| LOGNO2 | 387.643 | 5 | 1 | 0 | 6 | 399.643 | 408.0502 | 477.728 | 0.9510 |
| LOGNO | 387.643 | 5 | 1 | 0 | 6 | 399.643 | 408.0502 | 1730.673 | 0.9479 |
| EXP | 438.9191 | 4 | 0 | 0 | 4 | 446.9191 | 452.5239 | 541.460 | 0.7498 |

Table 2. Optimal model output of aboveground biomass using a GAMLSS with (i) Generalized Inverse Gaussian distribution, (ii) *µ*, *σ* and *ν* modeled with predictors

| Parameters | estimate | std.error | statistic | p.value |
| --- | --- | --- | --- | --- |
| µ |  |  |  |  |
| (Intercept) | 1.38 | 0.394 | 3.506 | 0.002 |
| DB | 0.014 | 0.007 | 2.077 | 0.048 |
| Crownsize | 0.035 | 0.004 | 7.814 | <0.001 |
| TreeHeight | 0.402 | 0.062 | 6.482 | <0.001 |
| Crownsize:TreeHeight | -0.002 | 0 | -6.598 | <0.001 |
| σ |  |  |  |  |
| (Intercept) | -1.154 | 0.234 | -4.942 | <0.001 |
| ν |  |  |  |  |
| (Intercept) | 4.137 | 8.735 | 0.474 | 0.639 |

Table 3. Comparison of various GAMMLSS models with different distribution to predict tree belowground biomass

| Model | Global deviance | df for mu | df for sigma | df | AIC | BIC | RMSE | Cox and Snell adjusted R2 |
| --- | --- | --- | --- | --- | --- | --- | --- | --- |
| EXP | 374.5057 | 2 | 0 | 2 | 378.5057 | 381.3081 | 222.9848 | 0.4913 |
| GA | 328.153 | 4 | 1 | 5 | 338.153 | 345.159 | 102.852 | 0.8898 |
| WEI2 | 360.1715 | 4 | 1 | 5 | 370.1715 | 377.1775 | 359.3578 | 0.6906 |
| WEI | 358.6068 | 7 | 1 | 8 | 374.6068 | 385.8164 | 359.3579 | 0.6968 |
| WEI3 | 323.8502 | 7 | 1 | 8 | 339.8502 | 351.0598 | 105.6803 | 0.9048 |

Table 4. Optimal model output of belowground biomass using a GAMLSS with (i) Gamma distribution, (ii) *µ* and *σ* modeled with predictors

| Parameters | estimate | std.error | statistic | p.value |
| --- | --- | --- | --- | --- |
| µ |  |  |  |  |
| (Intercept) | 0.845 | 0.442 | 1.911 | 0.067 |
| Crownsize | 0.034 | 0.005 | 7.293 | <0.001 |
| TreeHeight | 0.408 | 0.063 | 6.512 | <0.001 |
| Crownsize:TreeHeight | -0.002 | 0 | -6.007 | <0.001 |
| σ |  |  |  |  |
| (Intercept) | -1.066 | 0.127 | -8.416 | <0.001 |

Table 5. Comparison of various GAMMLSS models with different distribution to predict tree total biomass

| Model | Global deviance | df for mu | df for sigma | df for nu | df | AIC | BIC | RMSE | Cox and Snell adjusted R2 |
| --- | --- | --- | --- | --- | --- | --- | --- | --- | --- |
| EXP | 455.9202 | 4 | 0 | 0 | 4 | 463.9202 | 469.525 | 598.6093 | 0.7131 |
| GIG | 390.6711 | 5 | 2 | 1 | 8 | 406.6711 | 417.8807 | 589.705 | 0.9634 |
| LOGNO | 391.9351 | 5 | 2 | 0 | 7 | 405.9351 | 415.7434 | 2074.174 | 0.9645 |
| LOGNO2 | 391.9351 | 5 | 2 | 0 | 7 | 405.9351 | 415.7434 | 647.3132 | 0.9645 |

Table 6. Optimal model output of tree total biomass using a GAMLSS with (i) Generalized Inverse Gaussian distribution, (ii) *µ*, *σ* and *ν* modeled with predictors

| Parameters | estimate | std.error | statistic | p.value |
| --- | --- | --- | --- | --- |
| µ |  |  |  |  |
| (Intercept) | 1.813 | 0.202 | 8.954 | <0.001 |
| Crownsize | 0.036 | 0.004 | 10.145 | <0.001 |
| DB | 0.01 | 0.005 | 2.18 | 0.039 |
| TreeHeight | 0.4 | 0.037 | 10.92 | <0.001 |
| Crownsize:TreeHeight | -0.002 | 0 | -8.856 | <0.001 |
| σ |  |  |  |  |
| (Intercept) | -4.26 | 1.781 | -2.393 | 0.024 |
| TrunkHeight | 1.571 | 1.111 | 1.414 | 0.168 |
| ν |  |  |  |  |
| (Intercept) | -10.1 | 6.151 | -1.642 | 0.111 |

Table 7. Comparison of various GAMMLSS models with different distribution to predict tree carbon

| Model | Global deviance | df for mu | df for sigma | df for nu | df | AIC | BIC | RMSE | Cox and Snell adjusted R2 |
| --- | --- | --- | --- | --- | --- | --- | --- | --- | --- |
| EXP | 414.333 | 4 | 0 | 0 | 4 | 422.333 | 427.9378 | 299.278 | 0.7131 |
| GIG | 349.0749 | 5 | 2 | 1 | 8 | 365.0749 | 376.2845 | 294.7969 | 0.9634 |
| LOGNO | 350.341 | 5 | 2 | 0 | 7 | 364.341 | 374.1494 | 1035.024 | 0.9645 |
| LOGNO2 | 350.341 | 5 | 2 | 0 | 7 | 364.341 | 374.1494 | 323.6257 | 0.9645 |

Table 8. Optimal model output of tree carbon using a GAMLSS with (i) Generalized Inverse Gaussian distribution, (ii) *µ*, *σ* and *ν* modeled with predictors

| Parameters | estimate | std.error | statistic | p.value |
| --- | --- | --- | --- | --- |
| µ |  |  |  |  |
| (Intercept) | 1.12 | 0.202 | 5.535 | <0.001 |
| Crownsize | 0.036 | 0.004 | 10.146 | <0.001 |
| DB | 0.01 | 0.005 | 2.18 | 0.039 |
| TreeHeight | 0.4 | 0.037 | 10.922 | <0.001 |
| Crownsize:TreeHeight | -0.002 | 0 | -8.856 | <0.001 |
| σ |  |  |  |  |
| (Intercept) | -4.262 | 1.781 | -2.393 | 0.024 |
| TrunkHeight | 1.572 | 1.112 | 1.414 | 0.168 |
| ν |  |  |  |  |
| (Intercept) | -10.106 | 6.15 | -1.643 | 0.111 |

Tableau 9. Comparison of various GAMMLSS models with different distribution to predict root shoot ratio

| Model | Global deviance | df for mu | df for sigma | df for nu | df for tau | df | AIC | BIC | RMSE | Cox and Snell adjusted R2 |
| --- | --- | --- | --- | --- | --- | --- | --- | --- | --- | --- |
| GB1 | -47.8567 | 2 | 1 | 1 | 1 | 5 | -37.8567 | -30.8508 | 0.37 | 0.3821 |
| BEo | -42.6623 | 2 | 4 | 0 | 0 | 6 | -30.6623 | -22.2551 | 11.49 | 0.6739 |
| BE | -44.1244 | 2 | 4 | 0 | 0 | 6 | -32.1244 | -23.7172 | 0.17 | 0.6895 |
| BEOI | -43.3423 | 2 | 4 | 1 | 0 | 7 | -29.3423 | -19.5339 | 0.17 | 0.6813 |

Table 10. Optimal model output of root shoot ratio using a GAMLSS with (i) Beta distribution, (ii) *µ* and *σ* modeled with predictors

| Parameter | estimate | std.error | statistic | p.value |
| --- | --- | --- | --- | --- |
| µ |  |  |  |  |
| (Intercept) | 0.073 | 0.138 | 0.53 | 0.6 |
| Crownsize | -0.011 | 0.001 | -13.608 | <0.001 |
| σ |  |  |  |  |
| (Intercept) | 4.43 | 0.821 | 5.395 | <0.001 |
| TreeHeight | -0.507 | 0.116 | -4.374 | <0.001 |
| TrunkHeight | -0.765 | 0.33 | -2.319 | 0.028 |
| Crownsize | 0.011 | 0.006 | 1.792 | 0.085 |
