# Supplementary material for: Allometric modeling for accurate biomass and carbon estimation in shea trees of west african parklands
Source: Research Square preprint supplement (doi:10.21203/rs.3.rs-6882057/v1), 2025-07-03
Supplement: Supplementary file 2 [file 3670020c7b90ca745ca60d90.docx]

Figure S1. Fitting of several continuous theoretical distributions to the empirical distribution of aboveground biomass data


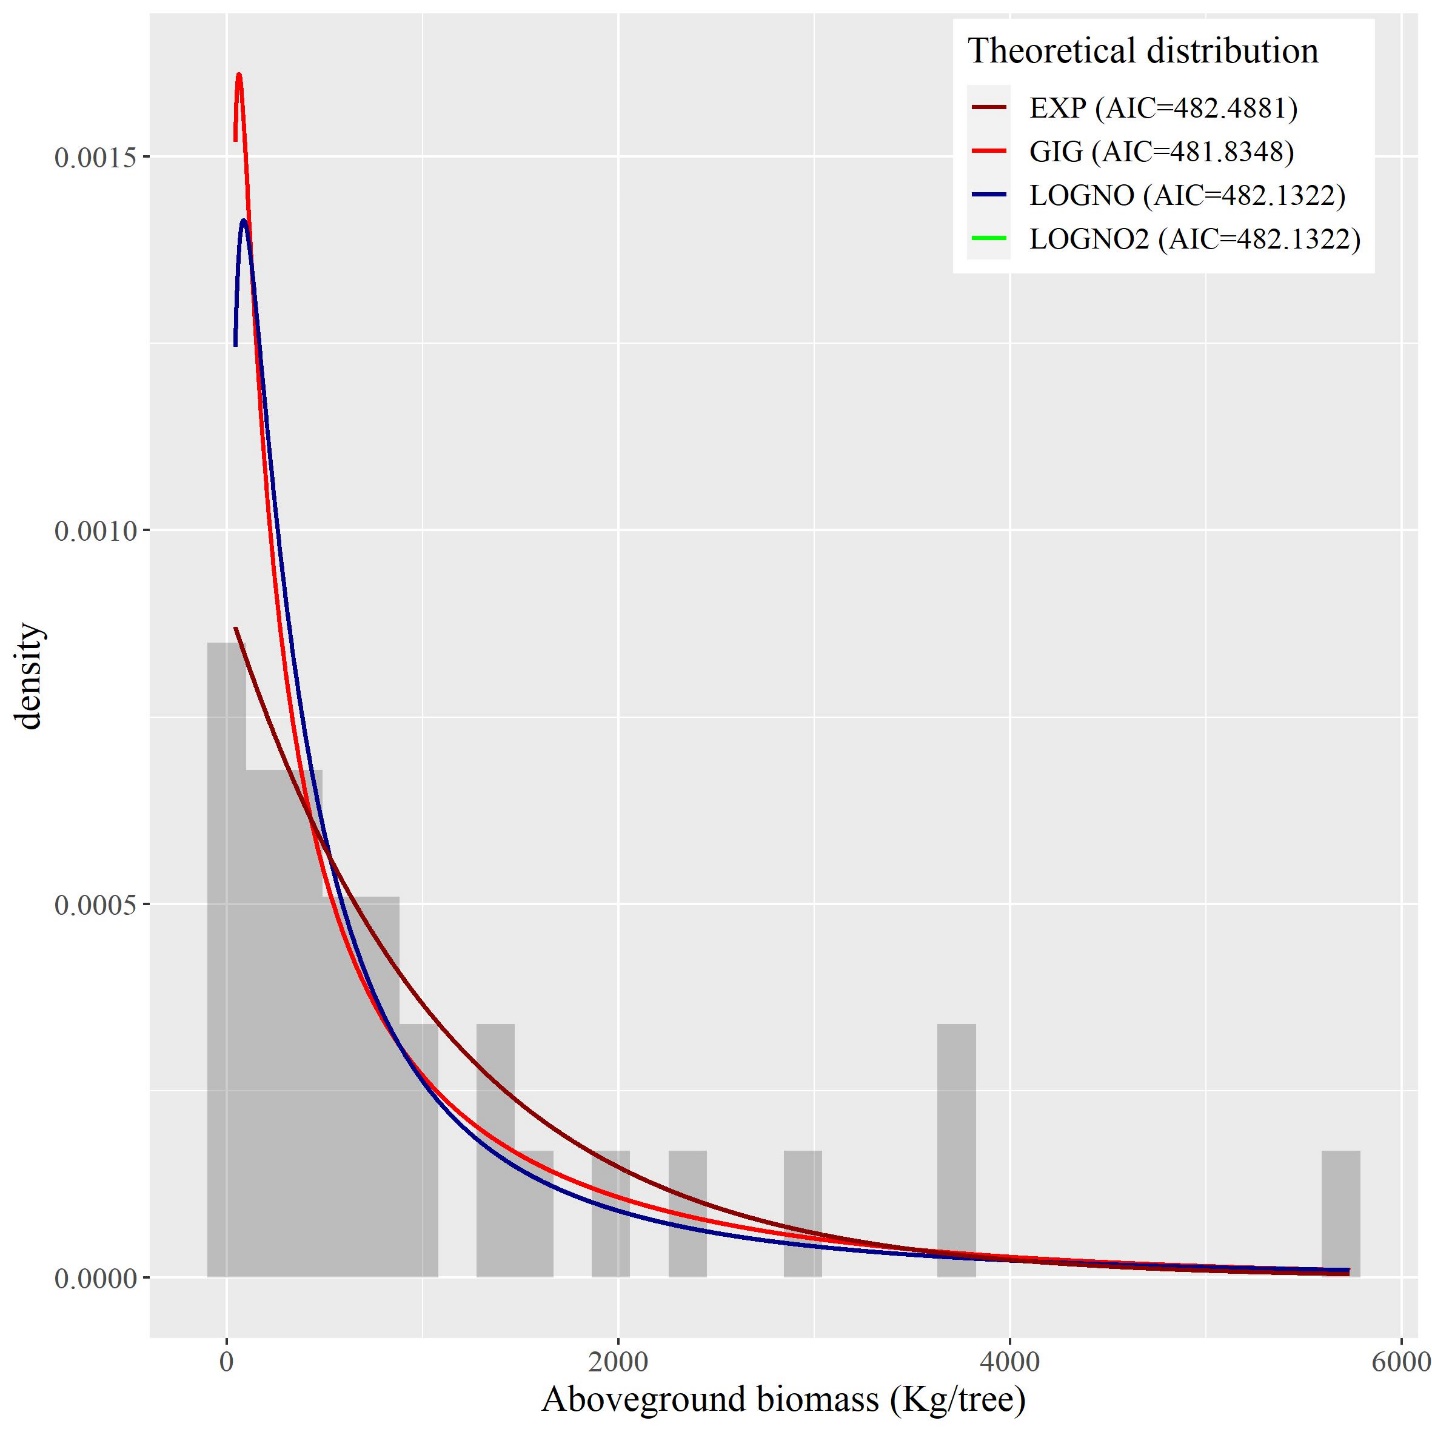


Figure S2. Fitting of several continuous theoretical distributions to the empirical distribution of belowground biomass data


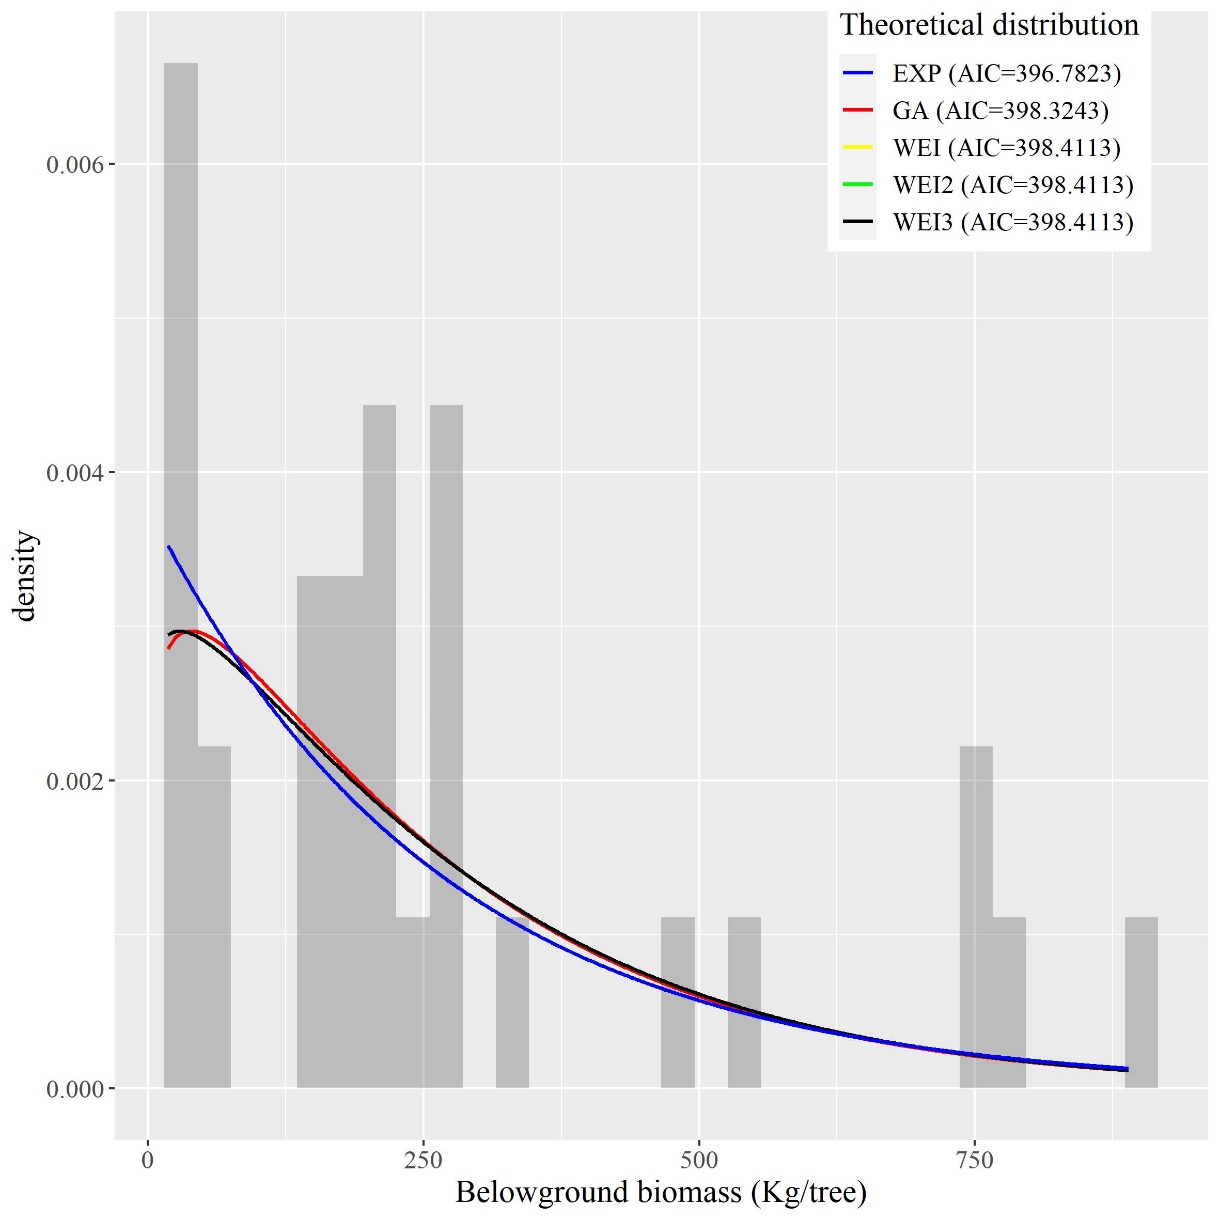


Figure S3. Fitting of several continuous theoretical distributions to the empirical distribution of tree total biomass data


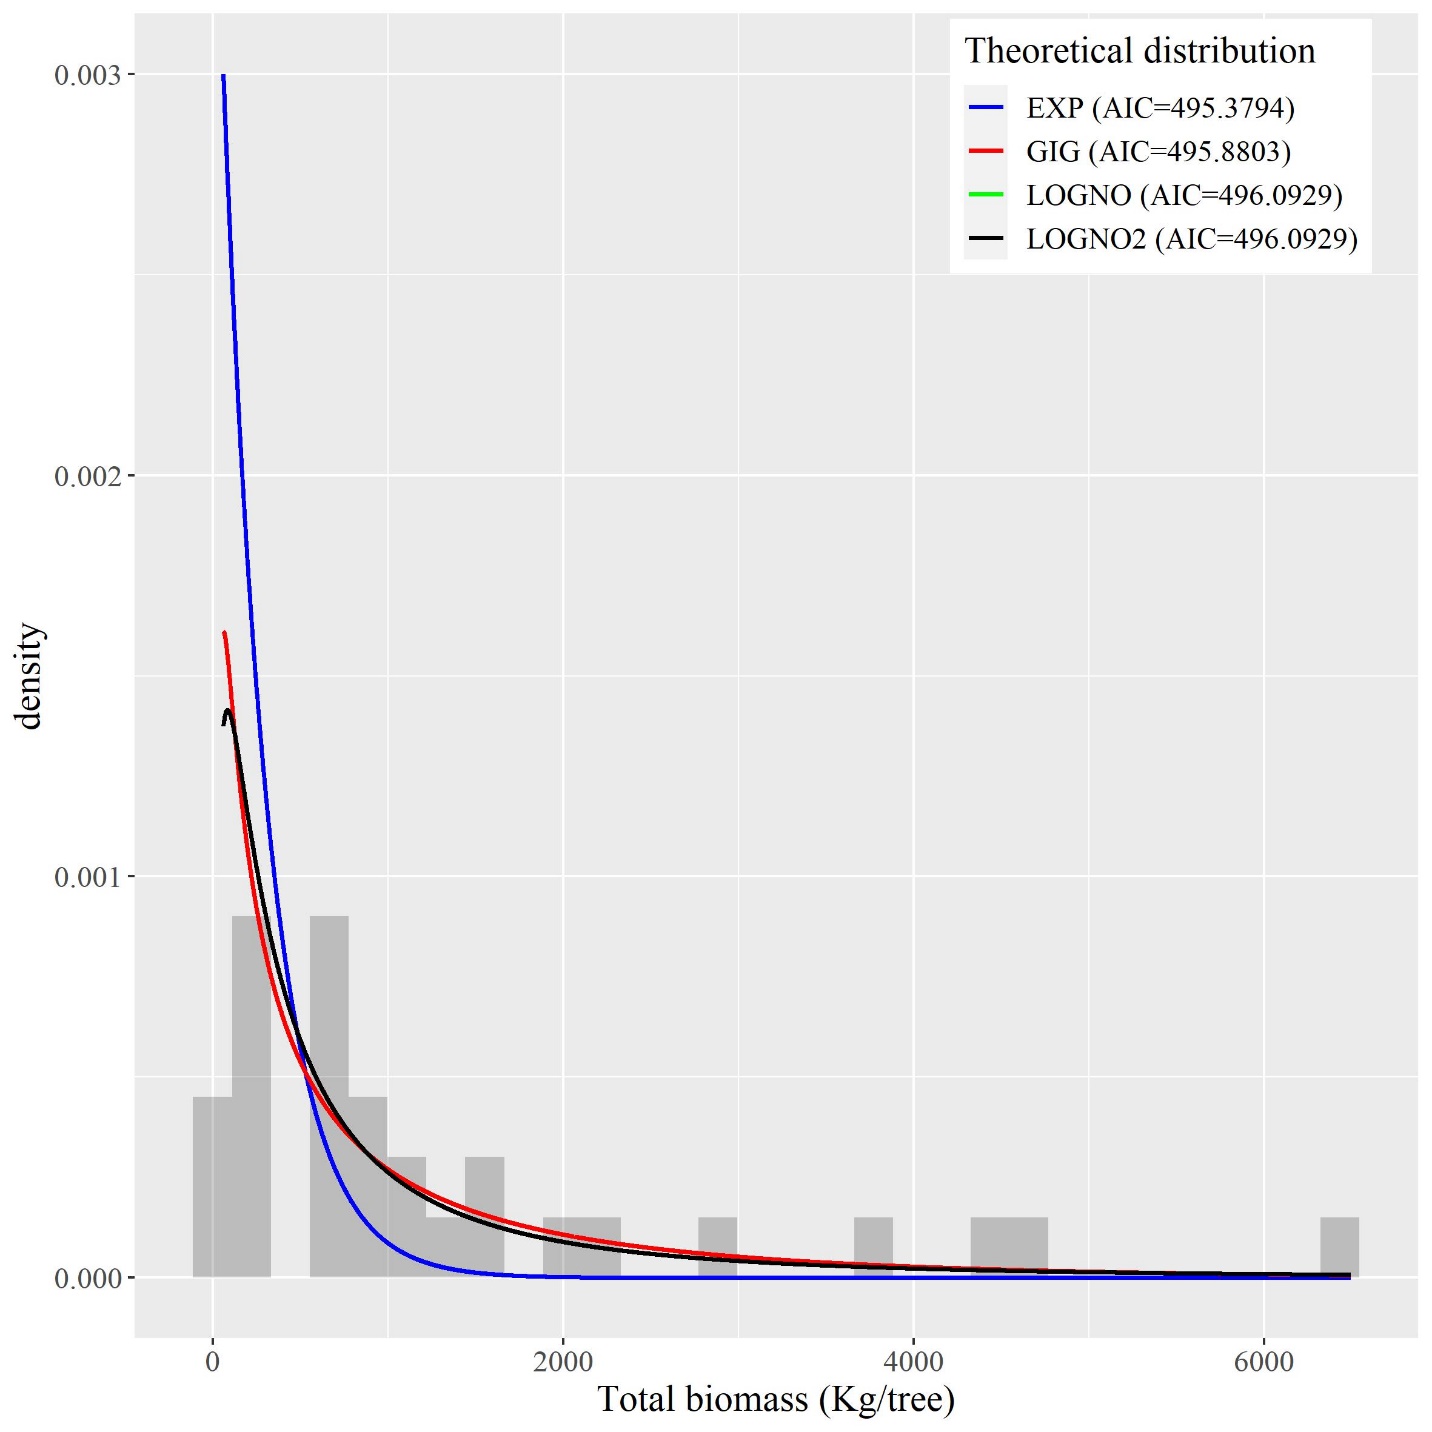


Figure S4. Fitting of several continuous theoretical distributions to the empirical distribution of carbon data


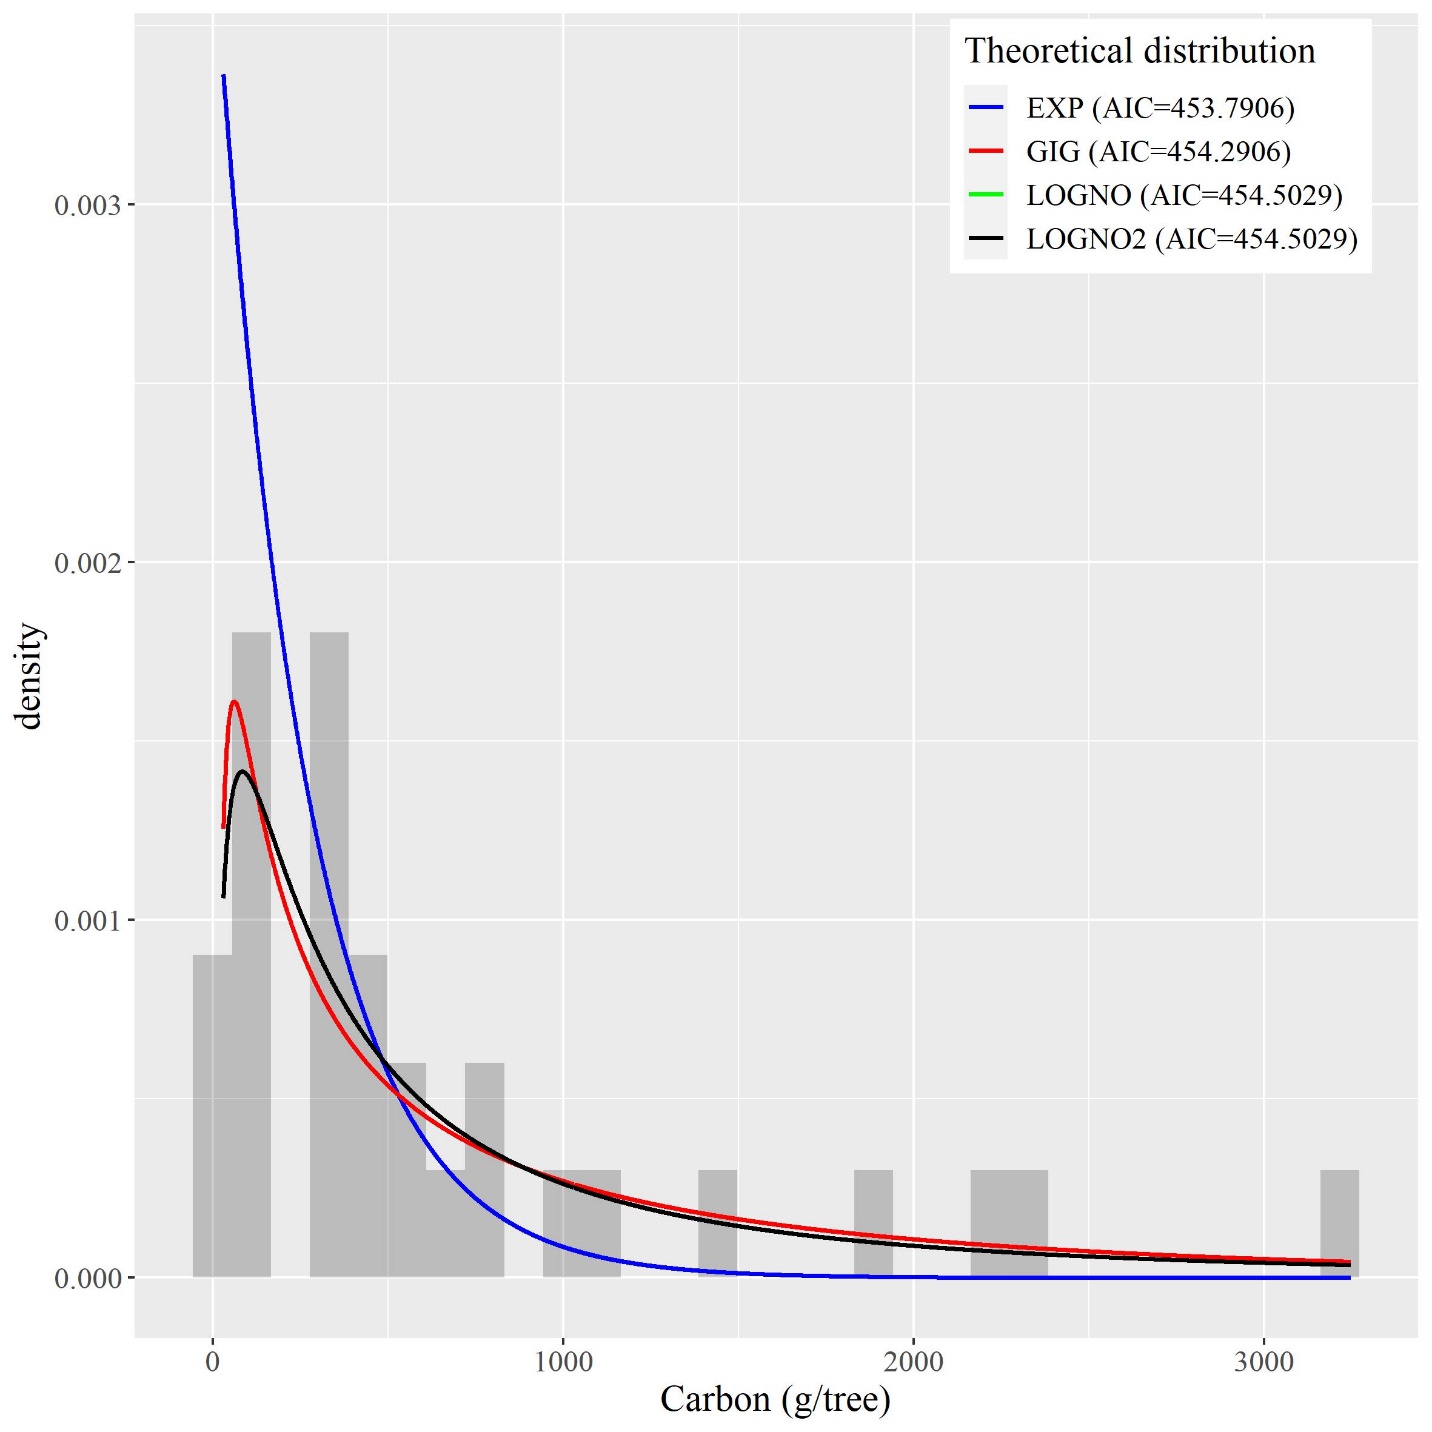


Figure S5. Fitting of several continuous theoretical distributions to the empirical distribution of Root shoot ratio data


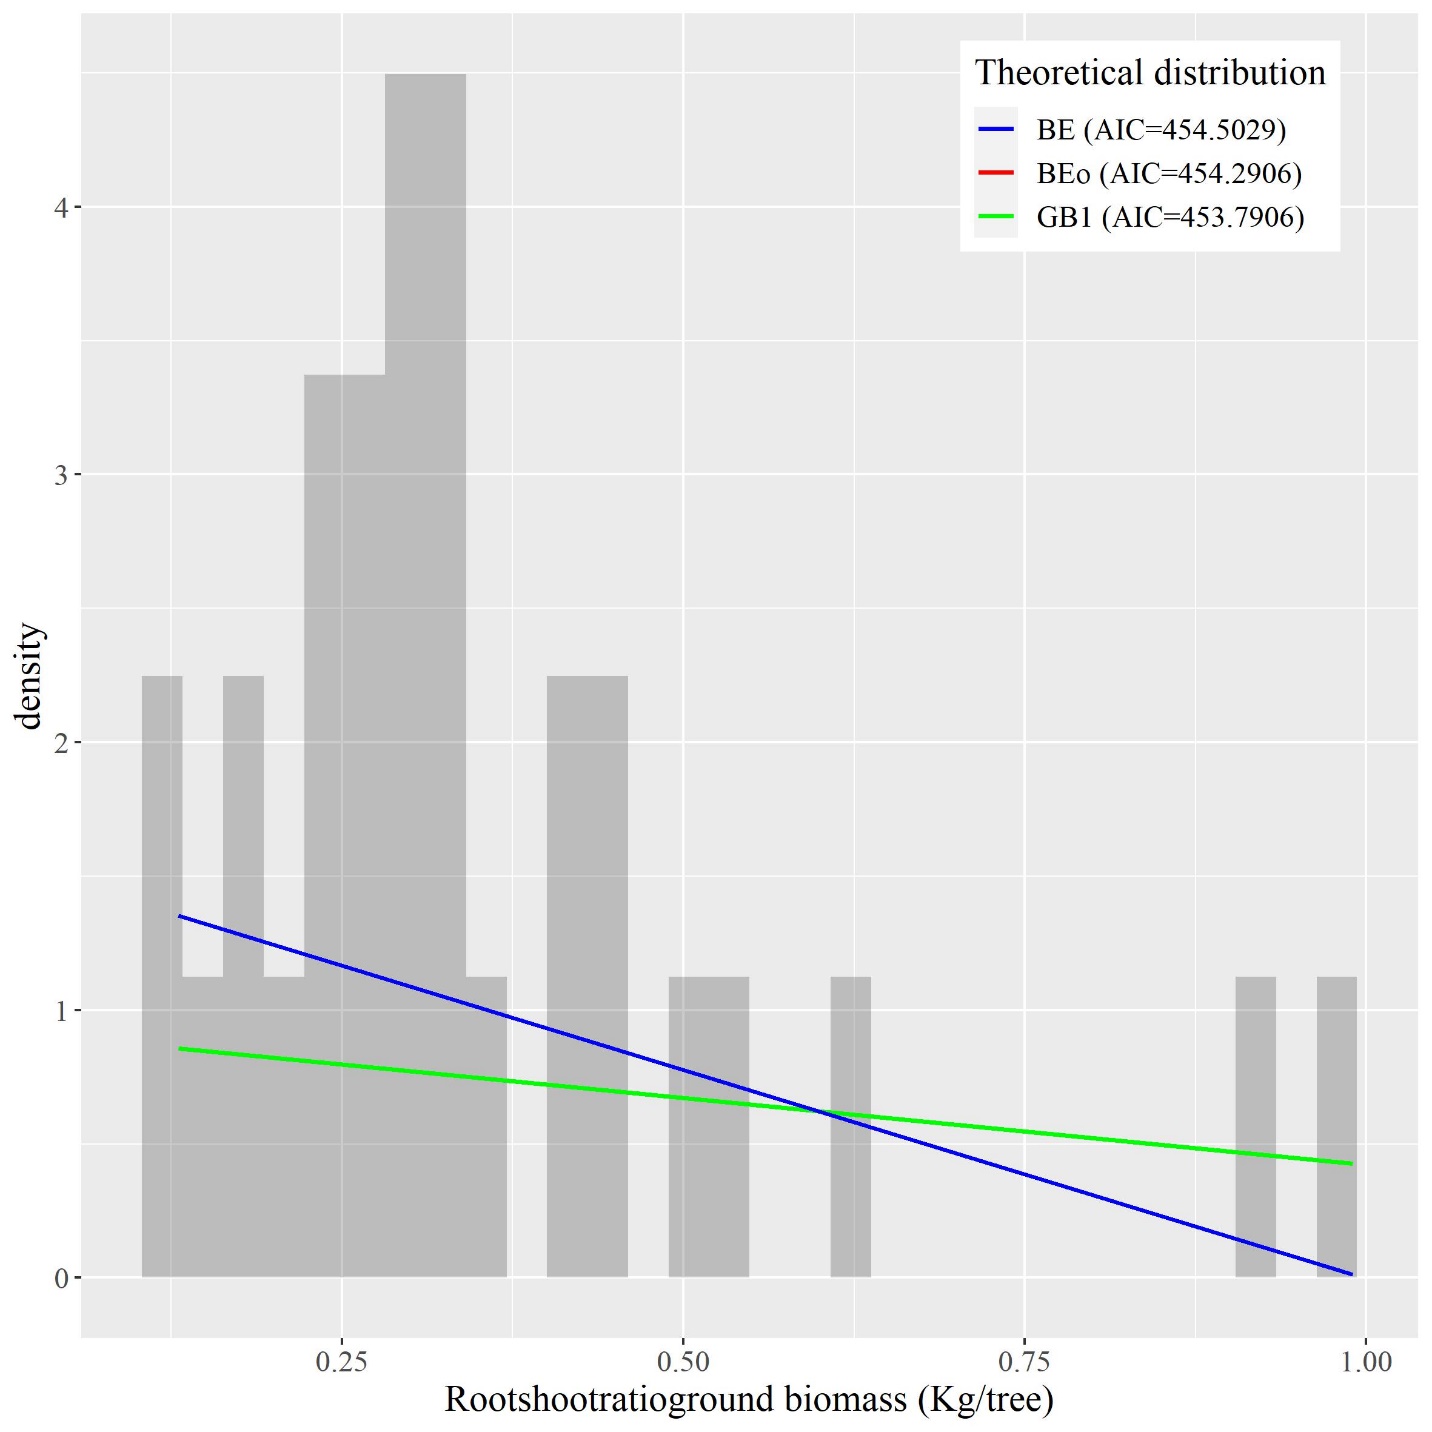


Figure S6. Above ground biomass model diagnostic


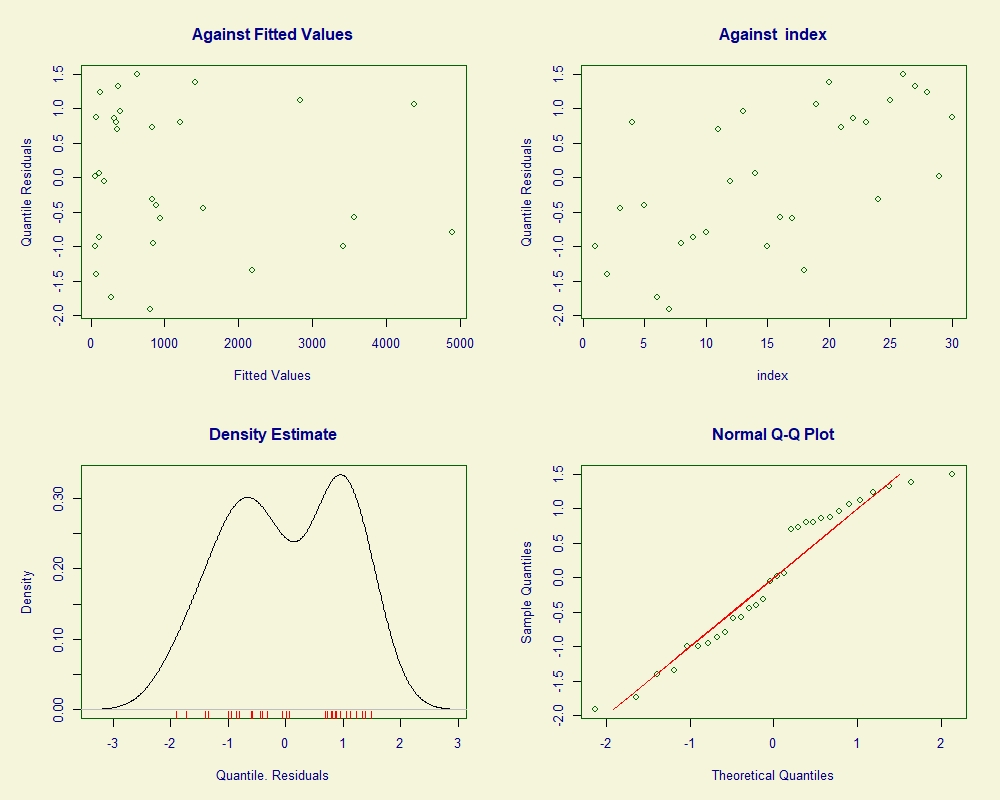


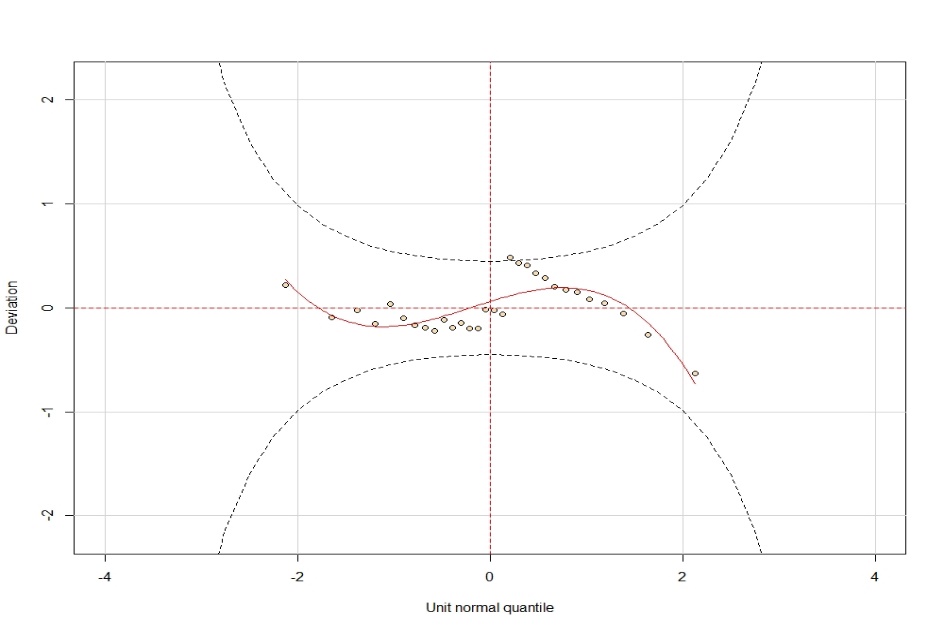


*******************************************************

Summary of the Quantile Residuals

mean = 0.000646407

variance = 1.048418

coef. of skewness = -0.1650785

coef. of kurtosis = 1.632525

Filliben correlation coefficient = 0.9714519

*******************************************************

The hypothesis of normality is rejected if the Filliben correlation coefficient is les than 0.984

Figure S7. Below ground biomass model diagnostic


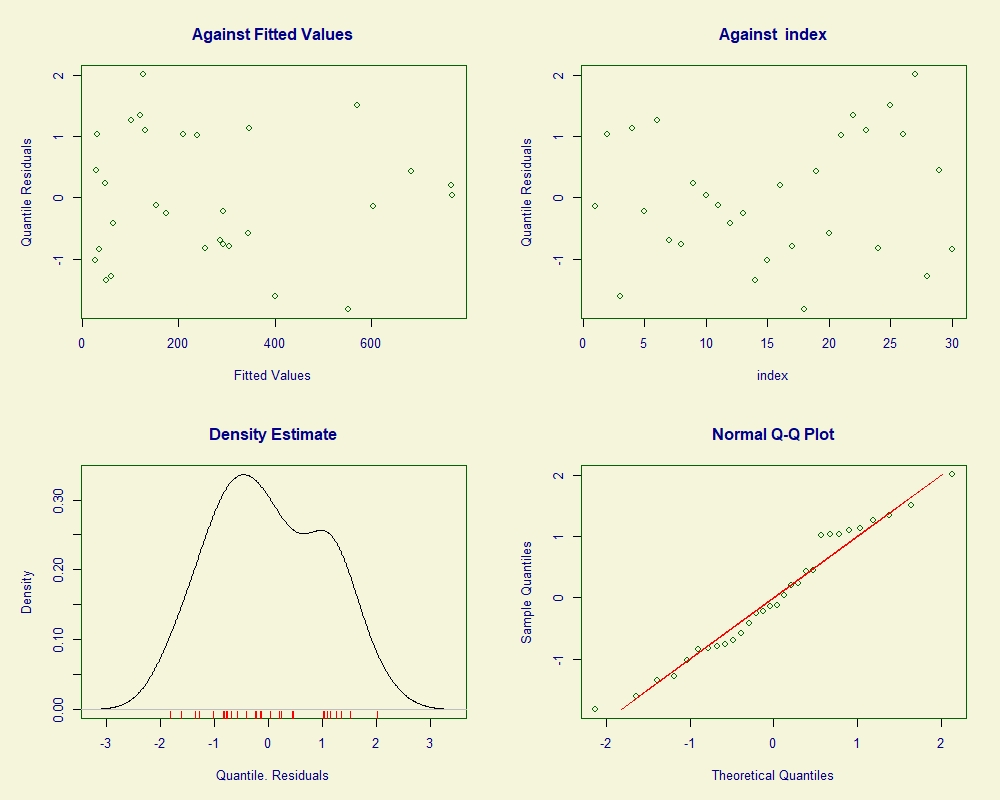


******************************************************************

Summary of the Quantile Residuals

mean = -0.0005359334

variance = 1.03431

coef. of skewness = 0.1110077

coef. of kurtosis = 1.888583

Filliben correlation coefficient = 0.9866691

******************************************************************

The hypothesis of normality is rejected if the Filliben correlation coefficient is les than 0.984

Figure S8. Total biomass model diagnostic


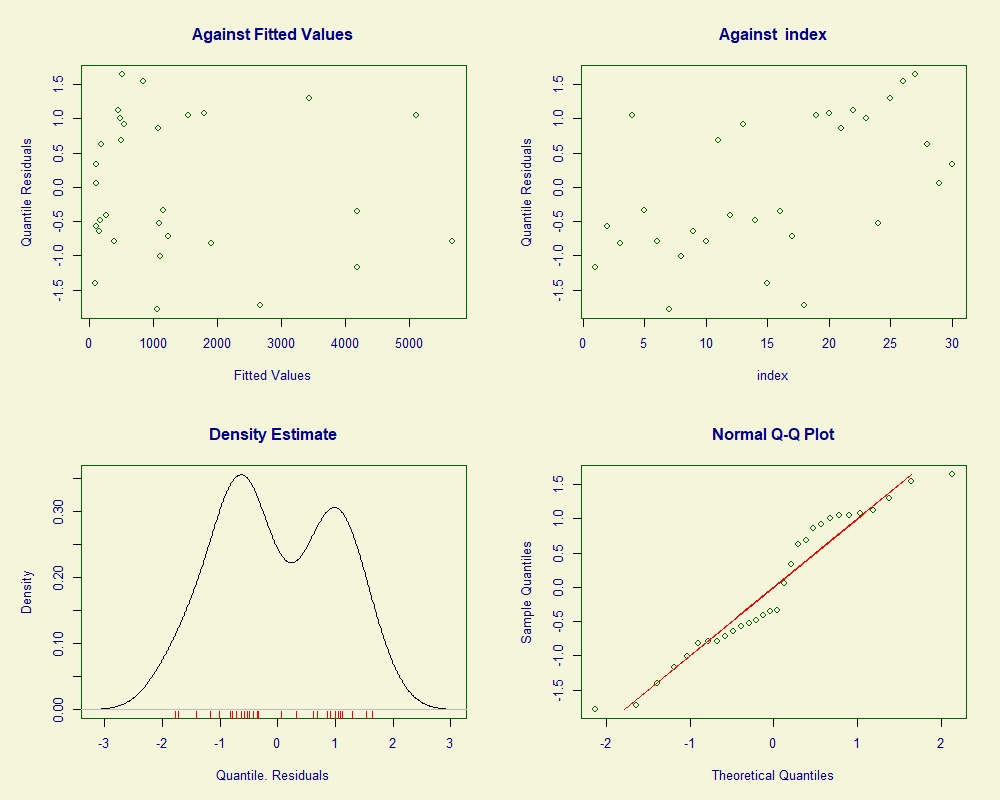


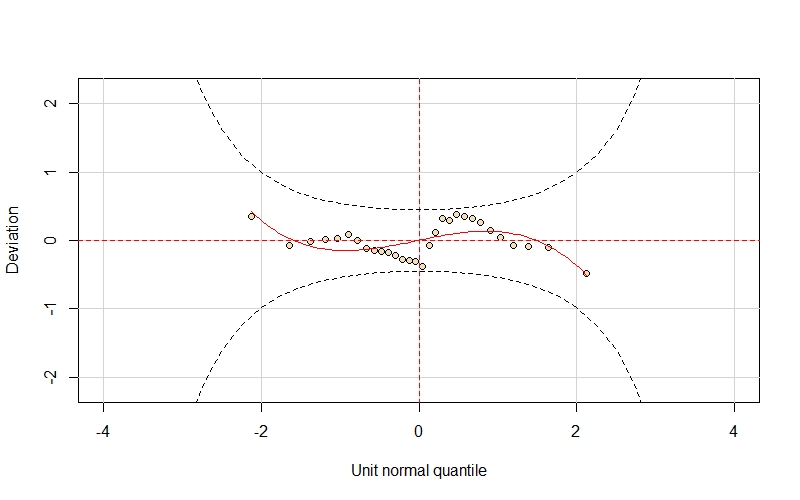


******************************************************************

Summary of the Quantile Residuals

mean = -0.008658969

variance = 1.017509

coef. of skewness = 0.005983705

coef. of kurtosis = 1.653998

Filliben correlation coefficient = 0.9724931

******************************************************************

The hypothesis of normality is rejected if the Filliben correlation coefficient is les than 0.984

Figure S9. Carbon model diagnostic


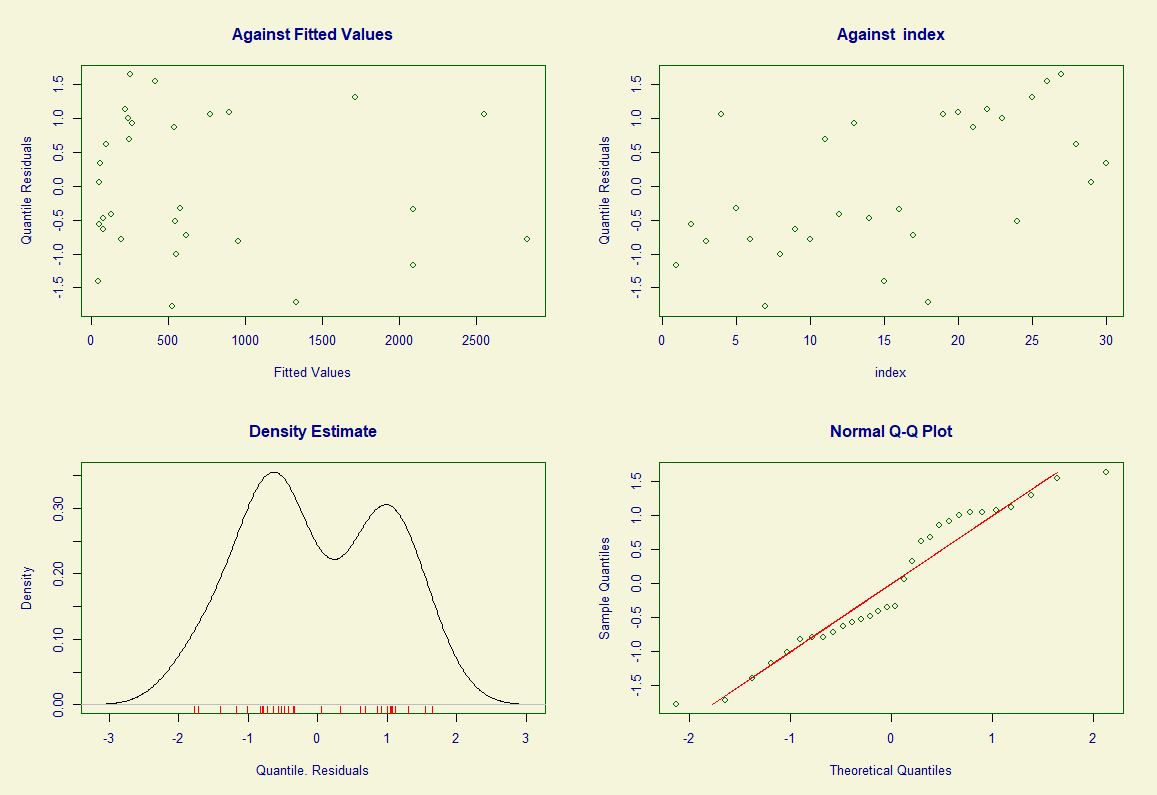


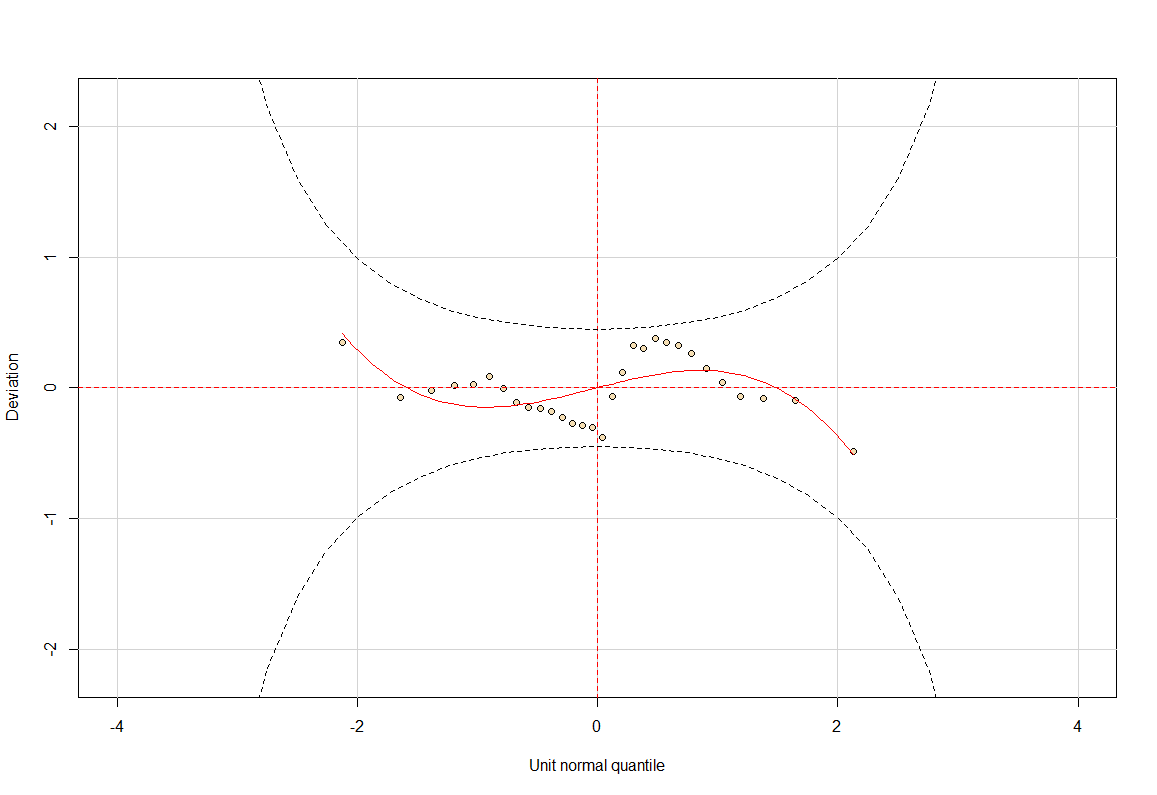


******************************************************************

Summary of the Quantile Residuals

mean = -0.008657266

variance = 1.017632

coef. of skewness = 0.006148252

coef. of kurtosis = 1.653948

Filliben correlation coefficient = 0.9724957

******************************************************************

The hypothesis of normality is rejected if the Filliben correlation coefficient is les than 0.984

Figure S10. Root shoot ratio model diagnostic


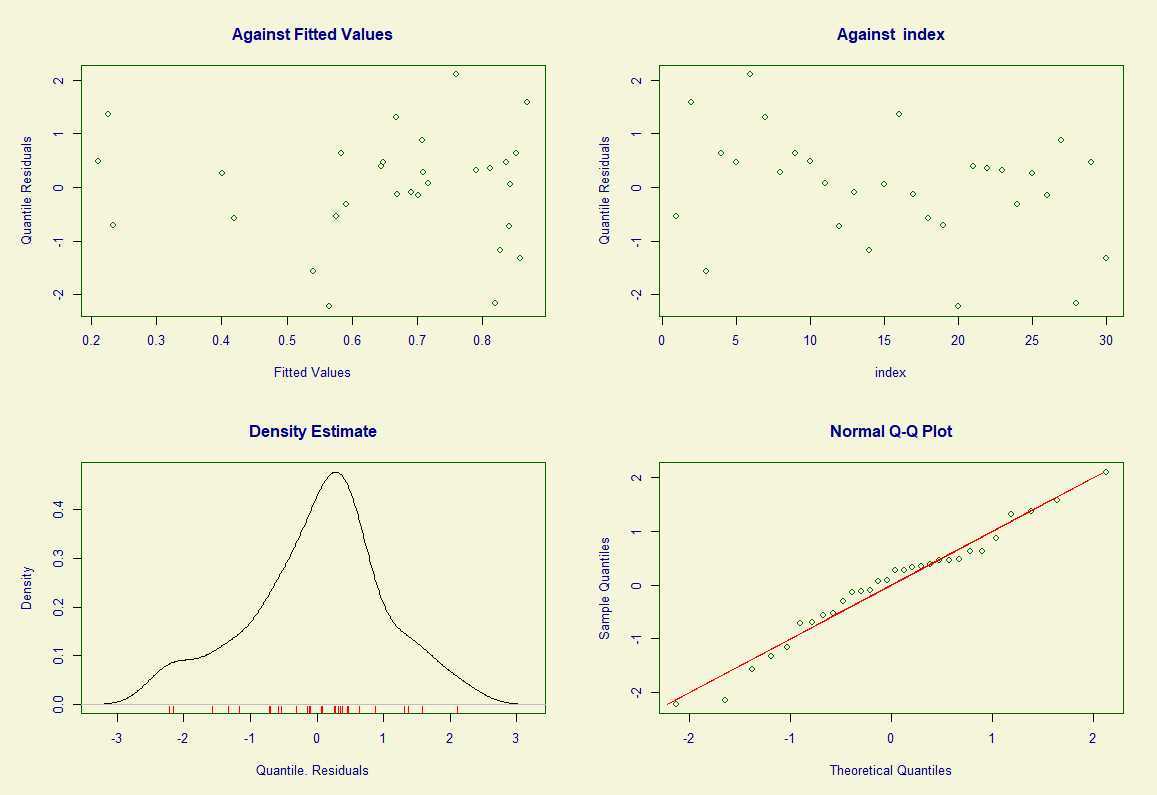


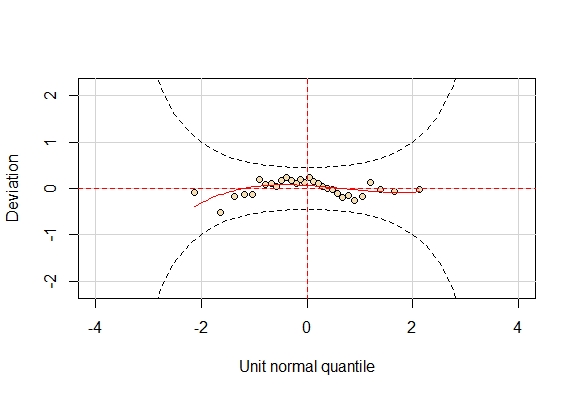


******************************************************************

Summary of the Quantile Residuals

mean = -1.911591e-05

variance = 1.040061

coef. of skewness = -0.3190016

coef. of kurtosis = 2.802528

Filliben correlation coefficient = 0.9858701

The hypothesis of normality is rejected if the Filliben correlation coefficient is les than 0.984
