# Supplementary material for: Allometric modeling for accurate biomass and carbon estimation in shea trees of west african parklands
Source: Research Square preprint supplement (doi:10.21203/rs.3.rs-6882057/v1), 2025-07-03
Supplement: Supplementary file 3 [file 885f6158518192341062e8b4.docx]

Table S1. AICs of the considered distribution adapted to continuous positive number of the marginal distribution of dependent variables.

| Distribution | AGB | BGB | Total biomass | Carbon stock | Root shoot Ratio |
| --- | --- | --- | --- | --- | --- |
| Generalised inv. Gaussian (GIG) | 481.8348 | 399.1223 | 495.8803 | 454.2906 | NA |
| Log normal 2 (LOGNO2) | 482.1322 | 399.8486 | 496.0929 | 454.5029 | NA |
| Log normal (LOGNO) | 482.1322 | 399.8486 | 496.0929 | 454.5029 | NA |
| Exponential (EXP) | 482.4881 | 396.7823 | 495.3794 | 453.7906 | NA |
| Pareto 2 original (PARETO2o) | 482.6734 | 398.7824 | 496.5376 | 454.9489 | NA |
| Pareto 2 (PARETO2) | 482.6734 | 398.7823 | 496.5376 | 454.9489 | NA |
| Pareto 2 repar (GP) | 482.6734 | 398.7823 | 496.5376 | 454.9489 | NA |
| Weibull (PH) (WEI2) | 482.7526 | 398.4113 | 496.6828 | 455.0943 | NA |
| Weibull (WEI) | 482.7526 | 398.4113 | 496.6828 | 455.0943 | NA |
| Weibull (µ the mean) (WEI3) | 482.7526 | 398.4113 | 496.6828 | 455.0943 | NA |
| Gamma (GA) | 483.238 | 398.3243 | 496.9671 | 455.3787 | NA |
| Inverse Gaussian (IG) | 483.6903 | 401.1121 | 497.0595 | 455.467 | NA |
| Generalised gamma (GG) | 483.7143 | 400.2337 | 497.6632 | 456.0739 | NA |
| Box-Cox Cole-Green (BCCG) | 483.7788 | 400.5121 | 497.7304 | 456.141 | NA |
| Box-Cox Cole-Green orig. (BCCGo) | 483.7788 | 400.5121 | 497.7304 | 456.141 | NA |
| Generalised beta type 2 (GB2) | 485.7146 | 402.2337 | 499.6632 | 458.074 | NA |
| Box-Cox t (BCT) | 485.7788 | 402.5121 | 499.7304 | 458.141 | NA |
| Box-Cox t orig. (BCTo) | 485.7788 | 403.1411 | 499.7304 | 458.141 | NA |
| Inverse gamma (IGAMMA) | 488.184 | 406.5068 | 501.6631 | 460.0698 | NA |
| Exponential Gaussian (exGAUS) | 523.0601 | 420.653 | 532.4187 | 490.8298 | NA |
| Generalised beta 1 (GB1) | NA | NA | NA | NA | -25.416 |
| Beta orig. (BEo) | NA | NA | NA | NA | -5.04024 |
| Beta (BE) | NA | NA | NA | NA | -5.04024 |
| Beta inflated at 0 (BEOI) | NA | NA | NA | NA | -3.04024 |
| Beta inflated at 1 (BEZI) | NA | NA | NA | NA | -3.04024 |
| Beta inflated at 1 (BEINF1) | NA | NA | NA | NA | -3.04024 |
| Beta inflated at 0 (BEINF0) | NA | NA | NA | NA | -3.04024 |
| Logit normal (LOGITNO) | NA | NA | NA | NA | -2.98198 |
| Beta inflated (BEINF) | NA | NA | NA | NA | -1.04024 |
| SIMPLEX | NA | NA | NA | NA | 17.85163 |

Table S2. Summary of the computation of variable inflation (VIF)

| Variables | VIF |
| --- | --- |
| DB | 10.553332 |
| DBH | 14.744184 |
| Crownsize | 7.756712 |
| TreeHeight | 5.798908 |
| TrunkHeight | 1.206462 |
